# Supplementary material for: Meteorologiska mätningar med ballong för bedömningar av ljudutbredning i Åkarp 2008
Source: PeerJ journal article supplement (doi:10.7717/peerj.5666), 2009-05-01

Model performance on test data using sample probabilities

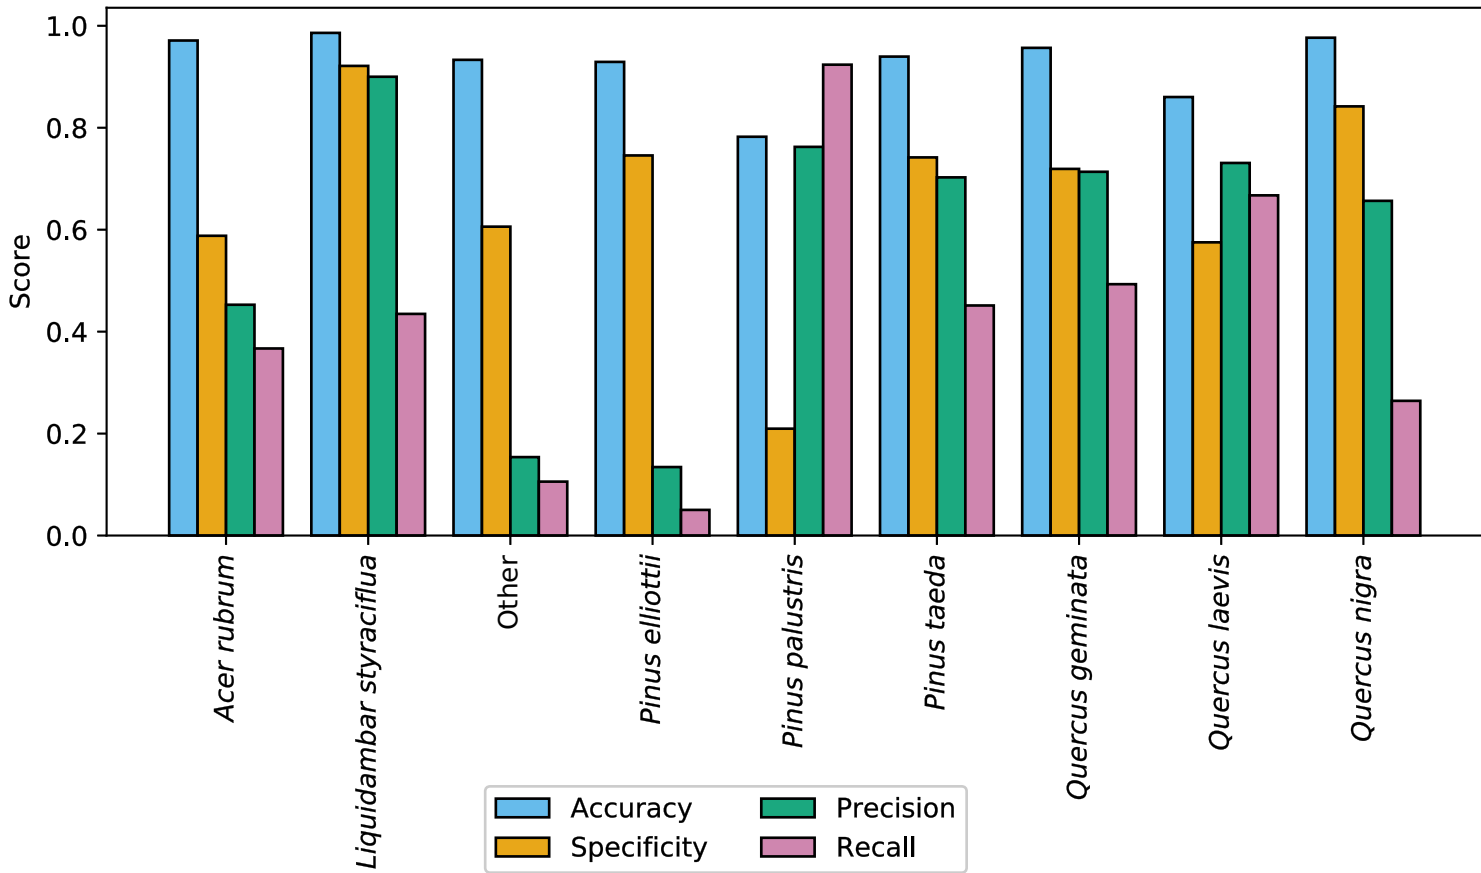

Supplement: Figure-S1.pdf [file Figure-S1.pdf]
